# Supplementary material for: Inflammation-Related Immune-Modulatory SLURP1 Prevents the Proliferation of Human Colon Cancer Cells, and Its Delivery by Salmonella Demonstrates Cross-Species Efficacy against Murine Colon Cancer
Source: MDPI journal article supplement (doi:10.3390/pharmaceutics15102462), 2023-10-13
Supplement: s1 [file s1]

Figure S1. Amino acid sequence alignment comparison of human SLURP1 and a few selected proteins. An amino acid sequence alignment was conducted for human SLURP1, human SLURP2, Human Lynx1, Human Lypd6, Mouse SLURP1, Neurotoxin 1, Erabutoxin, and  $\alpha$ - Bungarotoxin. The degree of sequence conservation was also demonstrated.

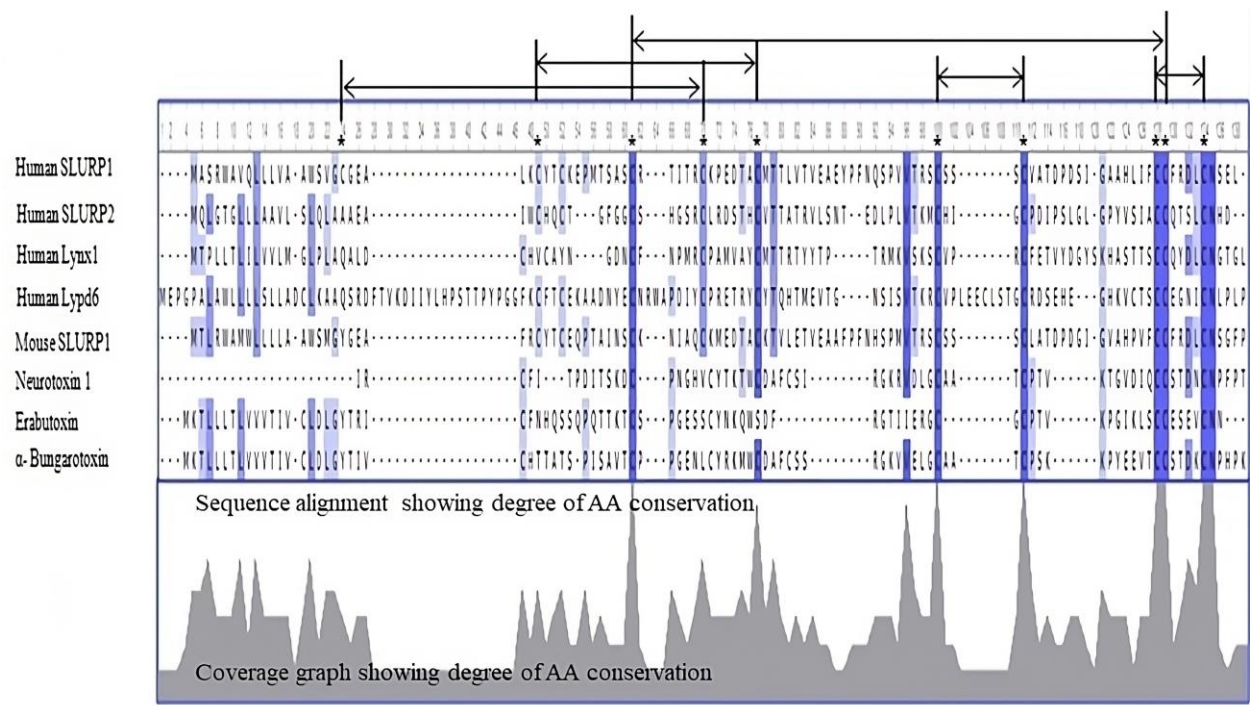

Figure S2. The original uncropped blot image showing all the bands with all molecular weight. Lanes 1 and 6 represent the molecular marker (size range from 10 to 180 kDa). Lanes 2 and 5 denote the purified rSLURP1 protein expressed by *E. coli* (DE3) as a positive control. Lane 3 indicates Vector control (VC) (ST JOL1800 with an empty vector), and lane 4 represents the therapeutic strain, JOL2238.

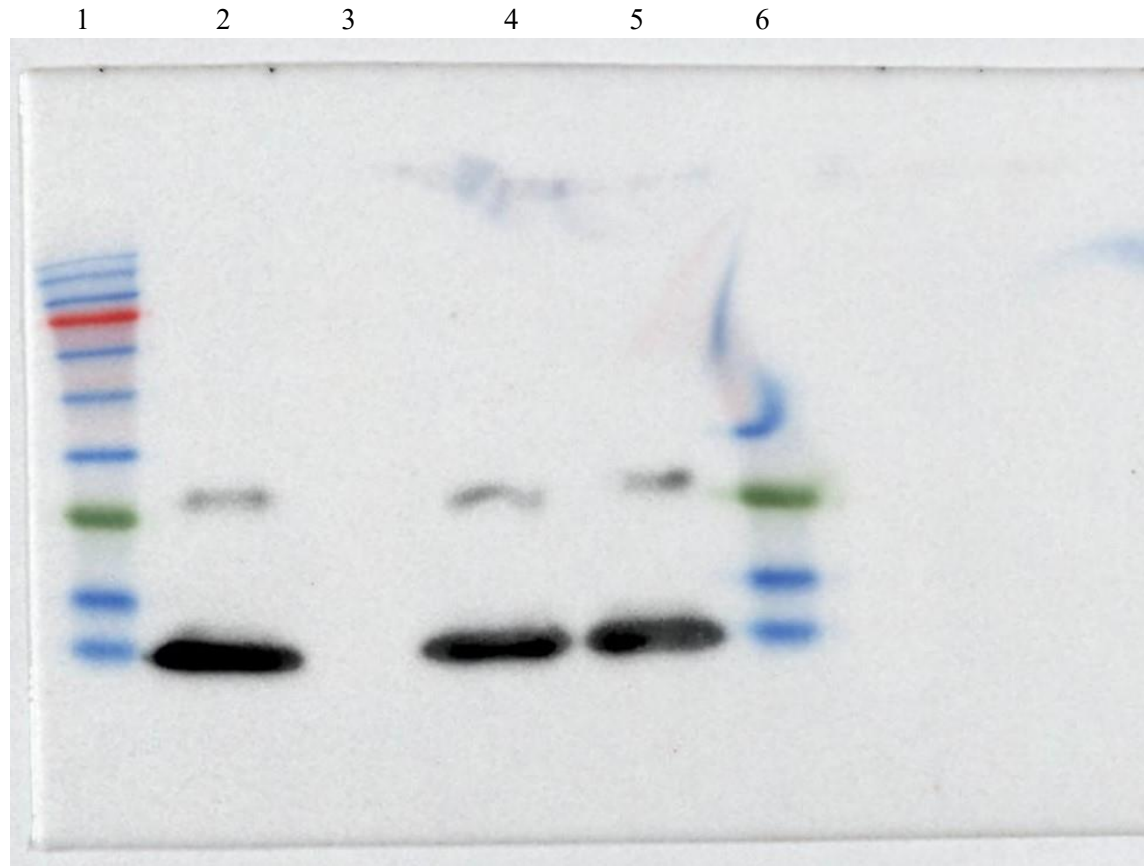

Table S1. Primer sequences used in qRT-PCR.

| Gene                |                | Forward                   | Reverse                   |
|---------------------|----------------|---------------------------|---------------------------|
| Cell cycle-related  | Cyclin E       | GTCCTGGCTGAATGTATACATGC   | CCCTATTTTGTTCAGACAACATGGC |
|                     | Cyclin B1      | GGCTTTTCTCTGATGTAATTCTTGC | GTATTTTGGTCTGACTGCTTGC    |
|                     | Cyclin B2      | CCTCCCTTTTCAGTCCGC        | CTCCTGTGTCAATATTCTCCAAATC |
|                     | Cyclin D1      | CATCTACACCGACAACCTCCATC   | TCTGGCATTTTGGAGAGGAAG     |
|                     | Cyclin D2      | GCTCTGTGCGCTACCGACTT      | CACGCTTCCAGTTGCAATCA      |
|                     | Cyclin D3      | TGATTGCGCACGACTTCCT       | CAAAGCCTGCCGGTCACT        |
|                     | Cyclin A2      | CTGCATTTGGCTGTGAACTAC     | ACAAACTCTGCTACTTCTGGG     |
| Endogenous receptor | nAChR          | CTGCATTTGGCTGTGAACTAC     | CACAAACTGAGACTAAGGCAG     |
| (Human)             | SLURP1         | TTCTGAGCACGGAGCAATG       | TTGCAGGTGTAGCACTTGAG      |
|                     | NF- $\kappa$ B | CTCCACAAGGCAGCAAATAGA     | ACTGGTCAGAGACTCGGTAAA     |
|                     | TNF- $\alpha$  | CTTGTTCTCAGCCTCTTCTC      | TCAGCTTGAGGGTTTGCTAC      |
|                     | IFN- $\gamma$  | GTGGAGACCATCAAGGAAGAC     | ACCTCGAAACAGCATCTGAC      |
|                     | IL-1 $\beta$   | CTGCGTGTTGAAAGATGATAAG    | CCACATTGAGCACAGGACTC      |
| (Mice)              | RelA           | GGTGGGCACTGGAGTTTATT      | GAGGATGGATGGTCCAACCTTAC   |
|                     | STAT1          | CTGGAGGAGTTGGAACAGAAA     | CTGAATGAGCTGCTGGAAGA      |
|                     | TBK1           | AGTACCCTGCTGCTCTATCA      | GTGGACGGTCTCGTTGTAATC     |
|                     | IRF3           | GTCTTAAGGAGCTGTTAGAGATGG  | TGGTCAGAGGTAAGGGAGATAG    |
|                     | GAPDH          | AACAGCAACTCCCCTCTTC       | CCTGTTGCTGTAGCCGTATT      |
|                     | NF- $\kappa$ B | TGGGACCAGCAAAGGTTATT      | GATCCCATCCTCACAGTGTTT     |
|                     | VEGF           | GCGAAGCTACTGCCGTCC        | TCTGCATTGTGATGTTGCTC      |
|                     | Bax            | AGGATGCGTCCACCAAGAAGCT    | TCCGTGTCCACGTCAGCAATCA    |
|                     | Bcl2           | CCTGTGGATGACTGAGTACCTG    | AGCCAGGAGAAATCAAACAGAGG   |
